# Supplementary material for: Speeding-Up Process Development of Continuous Slug Flow Crystallization for Novel Substance Systems
Source: Preprints.org preprint supplement (doi:10.20944/preprints202312.2336.v1), 2023-12-30
Supplement: Supplementary file 2 [file supplementary]

Archive with 5 entries (5 files):
- SI/SI_Speeding-Up Process Development of Continuous Slug Flow Crystallization.docx
- SI/SI_Speeding-Up Process Development of Continuous Slug Flow Crystallization.pdf
- SI/SloMo APAP_H2O.MOV
- SI/SloMo Arg_H2O.MOV
- SI/SloMo Met_H2O.MOV
